# Supplementary material
Source: Springer Nature journal article supplement (https://www.springermedizin.de/resource/supplementary/12939_2006_76_MOESM2_ESM.pdf/9551434)
Supplement: MOESM2 [file 9551434]

## Net ownership in 2000 and 2004

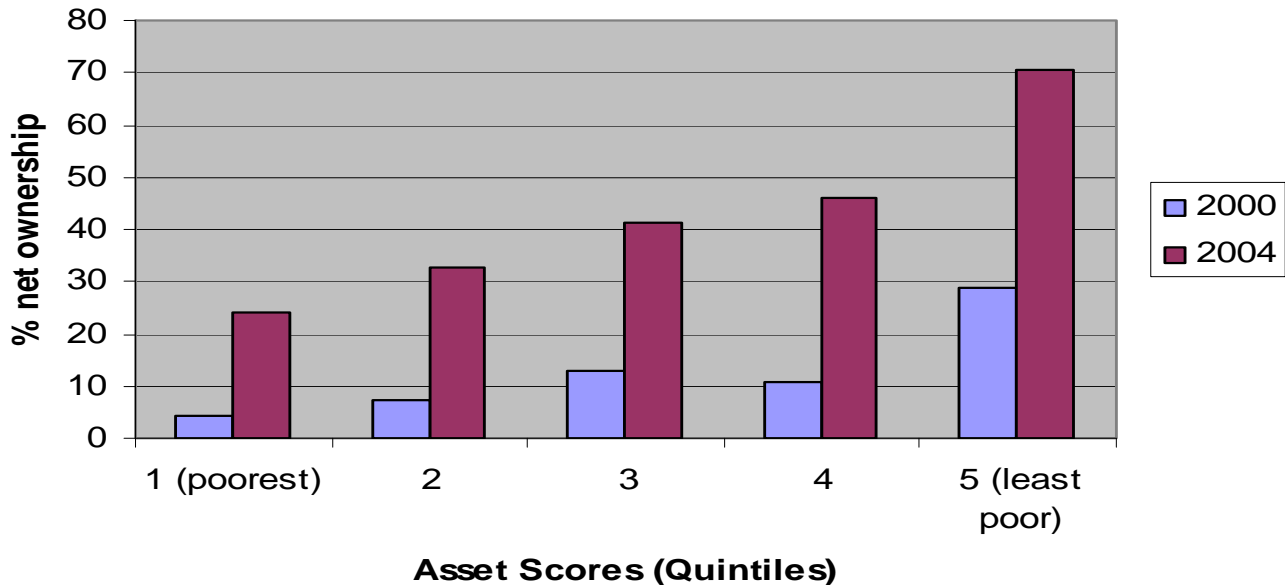

### Reaching the poorest of the poor

2000 = ITN ownership: 4.2%

2004 = ITN ownership: 24%

### Concentration Index

2000=0.33; 95% CI (0.2 – 0.5)

2004=0.11; 95% CI (0.03 – 0.26)
